# Supplementary material for: A scalable synthesis of ternary nanocatalysts for a high-efficiency electrooxidation catalysis by microfluidics
Source: Royal Society of Chemistry journal article supplement (doi:10.1039/d0nr03466e), 2020-01-01
Supplement: d0nr03466e1.pdf [file d0nr03466e1.pdf]

## Supplementary Material

### Scalable Synthesis of Ternary Nanocatalysts for High Efficiency Electrooxidation Catalysis by Microfluidics

Yingyan Zhou,<sup>a</sup> Dumei Wang,<sup>a</sup> Xueming Kang,<sup>a</sup> Dongtang Zhang,<sup>\*a</sup> Xiangnan Dou,<sup>a</sup> Xiayan Wang,<sup>a</sup> Guangsheng Guo<sup>ab</sup>

<sup>a</sup> Center of Excellence for Environmental Safety and Biological Effects, Beijing Key Laboratory for Green Catalysis and Separation, Department of Chemistry and Chemical Engineering, Beijing University of Technology, Beijing 100124, P. R. China

<sup>b</sup> Beijing Academy of Science and Technology, Beijing 100089, P. R. China

\*e-mail: [zhangdongtang@bjut.edu.cn](mailto:zhangdongtang@bjut.edu.cn)

## Supplementary Figures

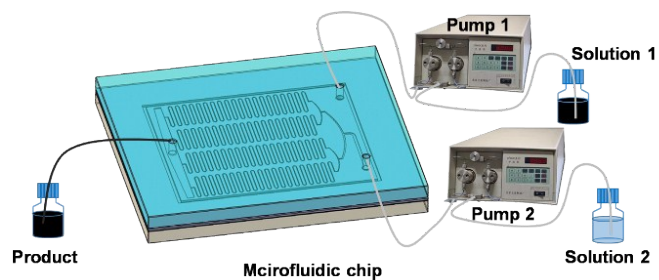

**Fig. S1.** The schematic illustration of microfluidic synthesis system.

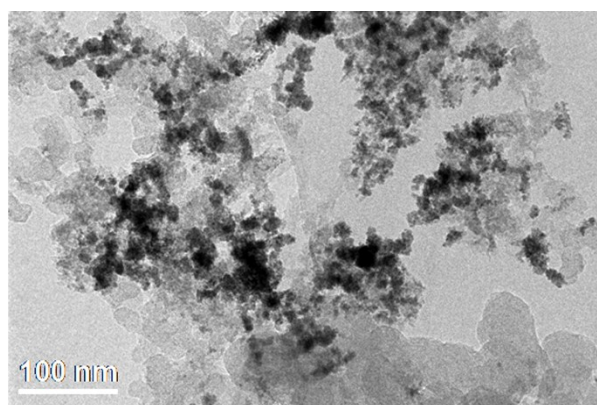

**Fig. S2.** TEM image of PtFeCu/C-H<sub>2</sub>O with the pump flow rate of 60 mL h<sup>-1</sup>.

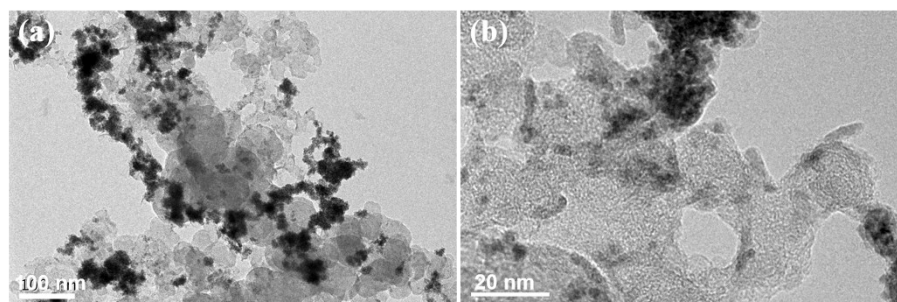

**Fig. S3.** Variously magnified TEM images of PtFeCu/C-EG with the pump flow rate of 60 mL h<sup>-1</sup>.

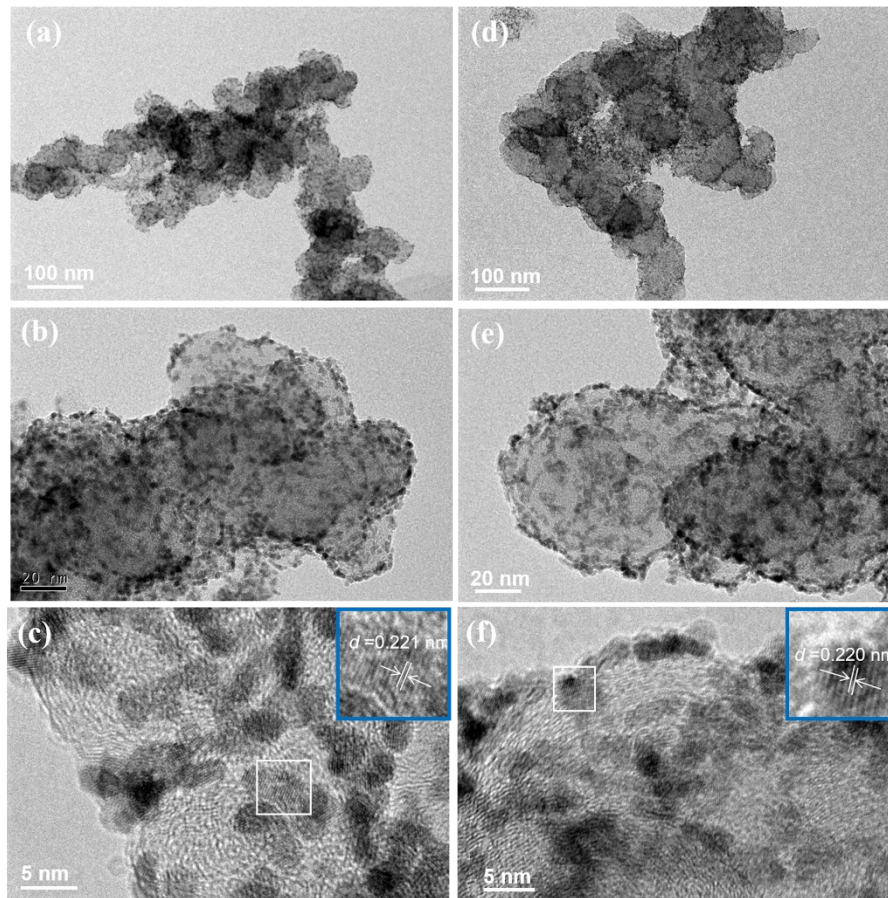

**Fig. S4.** Various magnified TEM images of PtFeCu/C prepared in PEG series solvents using flow rate of 60 mL h<sup>-1</sup>. (a-c) PEG400, (d-f) PEG600.

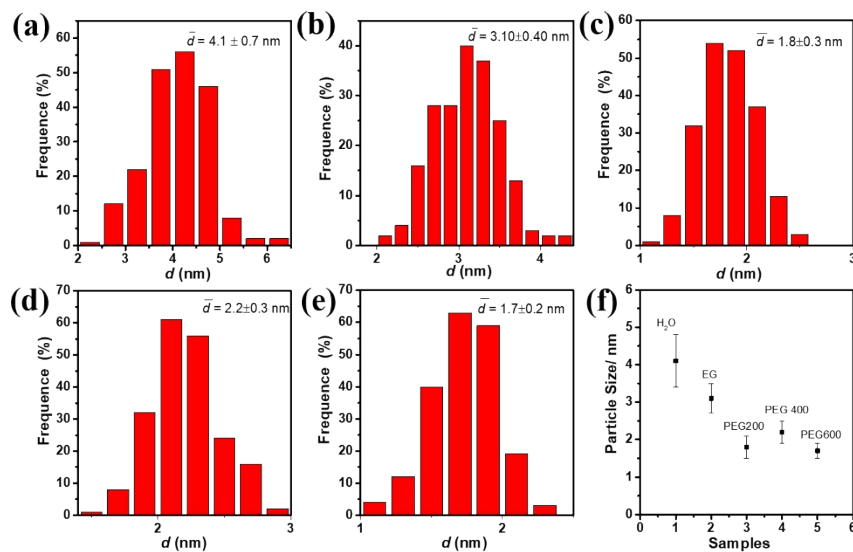

**Fig. S5.** Size histograms of the PtFeCu/C synthesized at a pump flow rate of 60 ml h<sup>-1</sup> in different solvents respectively. (a) H<sub>2</sub>O, (b) EG, (c) PEG200, (d) PEG400, (e) PEG600, (f) Particle size of different samples obtained in the above solvents.

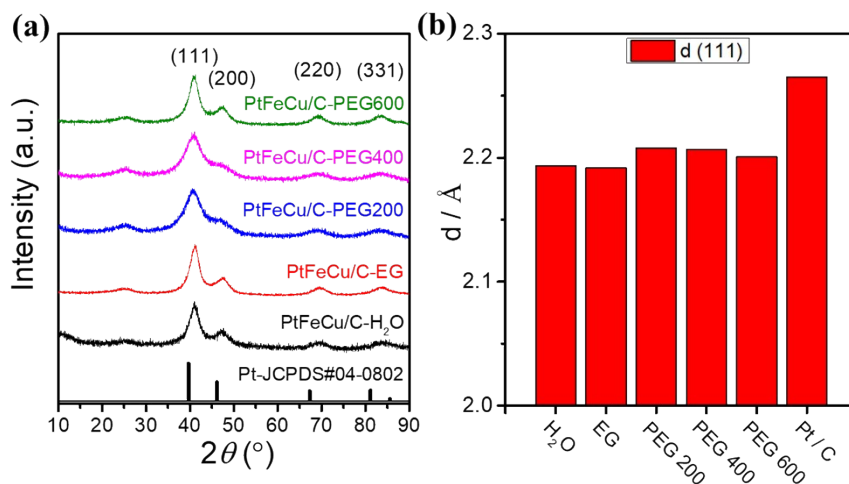

**Fig. S6.** (a) The XRD patterns of the PtFeCu/C synthesized in H<sub>2</sub>O, EG, PEG200, PEG400, and PEG600. (b) The distance of (111) plane for PtFeCu/C synthesized in different solvents.

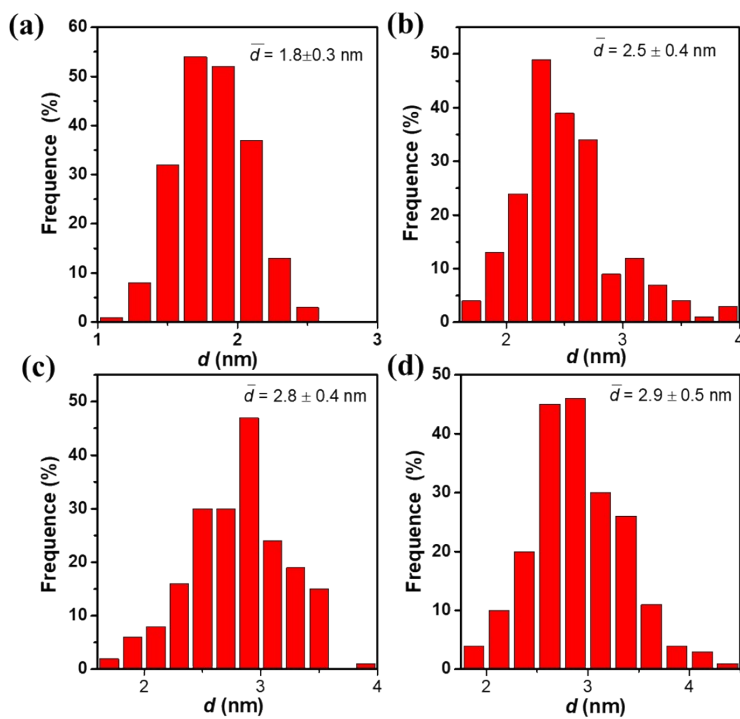

**Fig. S7.** Size histograms of the PtFeCu/C synthesized at varying pump flow speed. (a) 60 mL h<sup>-1</sup>, (b) 300 mL h<sup>-1</sup>, (c) 600 mL h<sup>-1</sup>, (d) 1200 mL h<sup>-1</sup>.

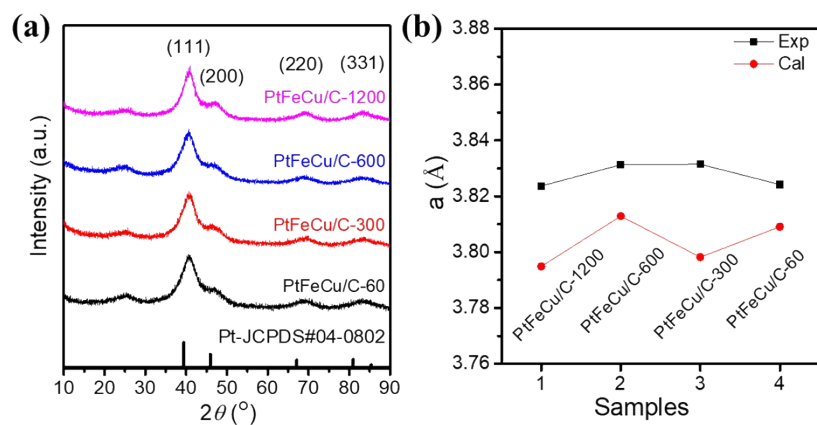

**Fig. S8.** (a) The XRD patterns of the PtFeCu/C synthesized in PEG200 with different pump flow speeds. (b) Calculated and experimental lattice parameters of samples obtained in varying flow rates.

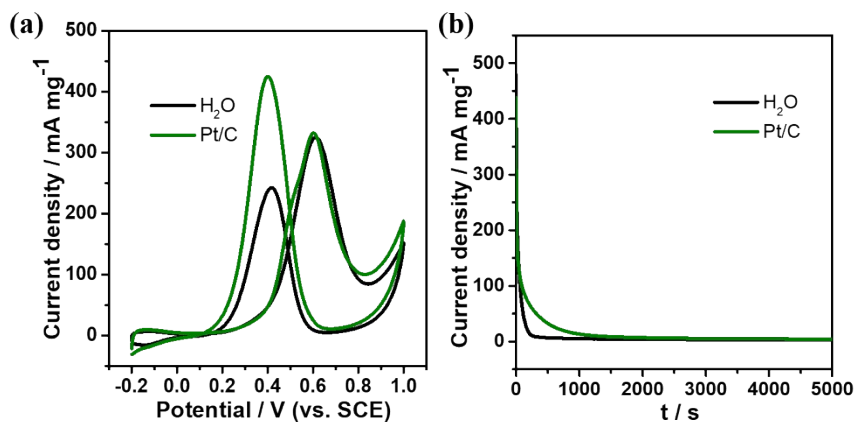

**Fig. S9.** Electrocatalytic properties of the PtFeCu/C synthesized in water solvent for methanol oxidation reaction (MOR). (a) Cyclic voltammograms of the PtFeCu/C obtained in water and commercial Pt/C in a  $N_2$ -saturated 0.5 mol/L  $H_2SO_4$  + 0.5 mol/L  $CH_3OH$  solution. Scanning rate is 50 mV/s. The currents were normalized by the mass on the GC surface. (b) Current-time curves of the catalyst and Pt/C recorded for 5000 s at 0.6V.

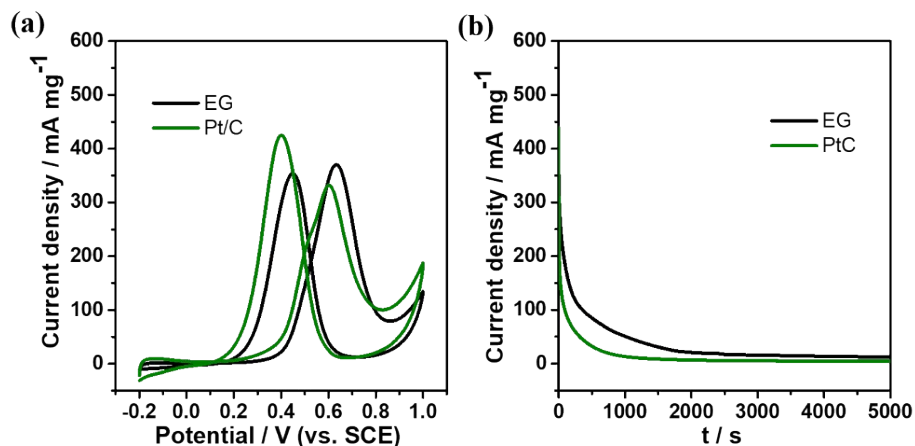

**Fig. S10.** Electrocatalytic properties of the PtFeCu/C synthesized in EG solvent for MOR. (a) Cyclic voltammograms of PtFeCu/C synthesized in EG and commercial Pt/C in a  $N_2$ -saturated 0.5 mol/L  $H_2SO_4$  + 0.5 mol/L  $CH_3OH$  solution. Scanning rate is 50 mV/s. The currents were normalized by the mass on the GC surface. (b) Current-time curves of the catalyst and Pt/C recorded for 5000 s at 0.6 V.

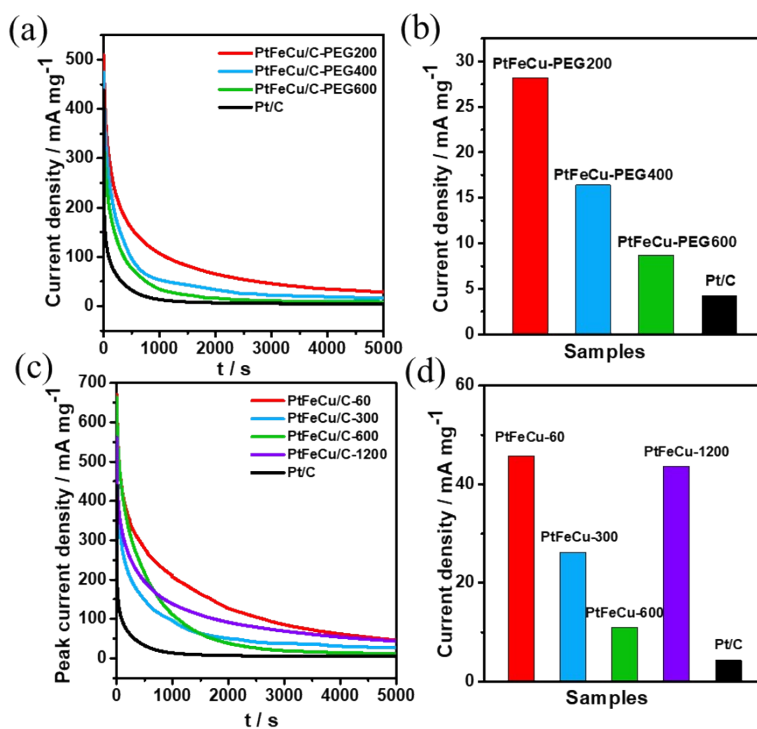

**Fig. S11.** (a) Chronoamperometric curves measured at 0.6 V for PtFeCu/C synthesized using PEG 200, 400 and 600, respectively, (b) Comparison of MOR current density at 5000 s in (a), (c) Chronoamperometric curves measured at 0.6 V for PtFeCu/C synthesized using PEG 200 at various flow rates, (d) Comparison of MOR current density at 5000 s in (c).

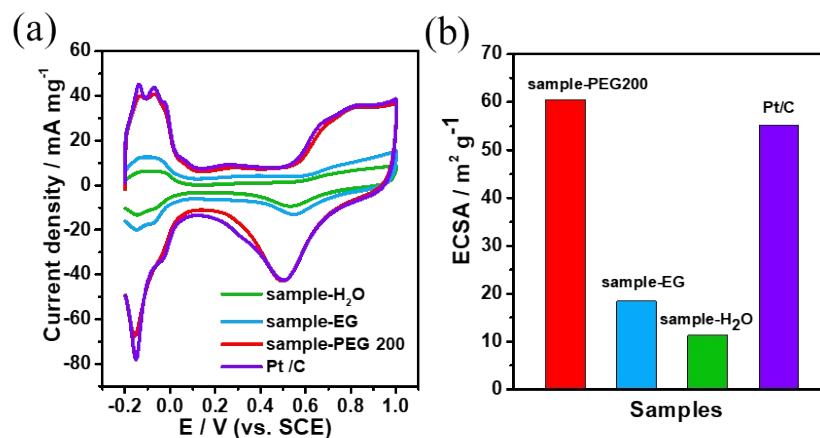

**Fig. S12.** Cyclic voltammetry curves and ECSA comparison of the PtFeCu/C obtained in different solvents and commercial Pt/C for MOR. (a) Cyclic voltammetry curves of the PtFeCu/C obtained in different solvents and commercial Pt/C in a N<sub>2</sub>-saturated 0.5 mol/L H<sub>2</sub>SO<sub>4</sub> solution. Scanning rate is 50 mV/s. The currents were normalized by the mass on the GC surface, (b) Comparison of ECSA of the catalysts prepared in different solvents and Pt/C.

## Supplementary Table

**Table S1.** The distance of (111) plane, lattice constant (a), diameter and full width at half maximum (FWHM) for PtFeCu/XC-72 synthesized in H<sub>2</sub>O, EG, PEG solvent series.

| Samples                   | 2 $\theta$ | $d(111)/\text{\AA}$ | $a/\text{\AA}$ | D/nm | FWHM  |
|---------------------------|------------|---------------------|----------------|------|-------|
| PtFeCu/C-H <sub>2</sub> O | 41.113     | 2.1937              | 3.7996         | 2.08 | 0.705 |
| PtFeCu/C-EG               | 41.153     | 2.1917              | 3.7961         | 1.55 | 0.947 |
| PtFeCu/C-PEG200           | 40.838     | 2.2079              | 3.8242         | 1.47 | 0.998 |
| PtFeCu/C-PEG400           | 40.857     | 2.2068              | 3.8223         | 1.48 | 0.991 |
| PtFeCu/C-PEG600           | 40.977     | 2.2007              | 3.8117         | 1.62 | 0.902 |
| PDF#04-0802               | 39.76      | 2.265               | 3.9231         | -    | -     |

**Table S2.** Pt loading, atomic ratio, ICP-AES composition and lattice constant calculated according to Vegard's law of PtFeCu/C in varying solvents.

| Samples                   | Pt Loading | Atomic ratio (Pt: Cu: Fe) | ICP Composition                                    | a/Å    |
|---------------------------|------------|---------------------------|----------------------------------------------------|--------|
| PtFeCu/C-H <sub>2</sub> O | 25.76%     | 40.32%: 33.47%: 26.21%    | Pt <sub>40</sub> Cu <sub>26</sub> Fe <sub>34</sub> | 3.7329 |
| PtFeCu/C-EG               | 29.94%     | 58.01%: 25.70%: 16.29%    | Pt <sub>58</sub> Cu <sub>26</sub> Fe <sub>16</sub> | 3.7898 |
| PtFeCu/C-PEG 200          | 30.66%     | 57.50%: 20.80%: 21.70%    | Pt <sub>57</sub> Cu <sub>21</sub> Fe <sub>22</sub> | 3.7869 |
| PtFeCu/C-PEG 400          | 33.11%     | 56.82%: 22.53%: 20.65%    | Pt <sub>57</sub> Cu <sub>23</sub> Fe <sub>21</sub> | 3.7851 |
| PtFeCu/C-PEG 600          | 26.11%     | 54.06%: 24.39%: 21.55%    | Pt <sub>54</sub> Cu <sub>24</sub> Fe <sub>22</sub> | 3.7764 |

**Table S3.** The bulk composition and surface composition of PtFeCu/C obtained from PEG 200, EG and H<sub>2</sub>O.

| Samples                   | The bulk atom percent of PtFeCu |      |      | The surface atom percent of PtFeCu |      |      |
|---------------------------|---------------------------------|------|------|------------------------------------|------|------|
|                           | Pt/%                            | Fe/% | Cu/% | Pt/%                               | Fe/% | Cu/% |
| PtFeCu/C-PEG 200          | 53                              | 18   | 29   | 53                                 | 26   | 21   |
| PtFeCu/C-EG               | 59                              | 11   | 30   | 51                                 | 31   | 18   |
| PtFeCu/C-H <sub>2</sub> O | 40                              | 26   | 34   | 29                                 | 56   | 15   |



**Table S4.** XPS analysis result of Pt 4f, Cu 2p, Fe 2p spectra in PtFeCu/C-PEG200, PtFeCu/C-EG and PtFeCu/C-H<sub>2</sub>O.

| Samples                   | Species              | Binding energy | Assignment       | Atomic ratio (%) |
|---------------------------|----------------------|----------------|------------------|------------------|
| PtFeCu/C-PEG 200          | Pt 4f <sub>7/2</sub> | 71.35          | Pt               | 41.7             |
|                           |                      | 71.33          | PtO              | 45.5             |
|                           |                      | 70.25          | PtO <sub>2</sub> | 12.8             |
|                           | Cu 2p <sub>3/2</sub> | 933.26         | Cu               | 58.3             |
|                           |                      | 933.27         | CuO <sub>x</sub> | 41.7             |
|                           | Fe 2p <sub>3/2</sub> | 712.10         | Fe               | 42.3             |
|                           |                      | 720.06         | FeO <sub>x</sub> | 57.7             |
| PtFeCu/C-EG               | Pt 4f <sub>7/2</sub> | 71.33          | Pt               | 55.2             |
|                           |                      | 72.05          | PtO              | 44.8             |
|                           | Cu 2p <sub>3/2</sub> | 931.29         | Cu               | 57.5             |
|                           |                      | 933.39         | CuO <sub>x</sub> | 42.5             |
|                           | Fe 2p <sub>3/2</sub> | 711.83         | Fe               | 56.7             |
|                           |                      | 718.07         | FeO <sub>x</sub> | 43.3             |
| PtFeCu/C-H <sub>2</sub> O | Pt 4f <sub>7/2</sub> | 70.25          | Pt               | 52.5             |
|                           |                      | 72             | PtO              | 28.5             |
|                           |                      | 74.38          | PtO <sub>2</sub> | 19.0             |
|                           | Cu 2p <sub>3/2</sub> | 932.2          | Cu               | 55.5             |
|                           |                      | 933.43         | CuO <sub>x</sub> | 45.5             |
|                           | Fe 2p <sub>3/2</sub> | 711.82         | Fe               | 54.5             |
|                           |                      | 715.90         | FeO <sub>x</sub> | 45.5             |

**Table S5.** Pt loading, atomic ratio and ICP-AES composition results for PtFeCu/C in varying pump flow speed.

| Pump speed (mL h <sup>-1</sup> ) | Pt Loading | Atomic Ratio (Pt: Cu: Fe) | ICP Composition                                    | a (Å)  |
|----------------------------------|------------|---------------------------|----------------------------------------------------|--------|
| 1200                             | 35.23 %    | 59.72%: 22.38%: 17.90%    | Pt <sub>60</sub> Cu <sub>22</sub> Fe <sub>18</sub> | 3.7947 |
| 600                              | 33.87 %    | 65.08%: 24.10%: 10.82%    | Pt <sub>65</sub> Cu <sub>24</sub> Fe <sub>11</sub> | 3.8129 |
| 300                              | 33.16 %    | 60.77%: 22.31%: 16.92%    | Pt <sub>61</sub> Cu <sub>22</sub> Fe <sub>17</sub> | 3.7982 |
| 60                               | 33.20 %    | 64.02%: 23.06%: 12.92%    | Pt <sub>64</sub> Cu <sub>23</sub> Fe <sub>13</sub> | 3.8091 |

**Table S6.** The distance of (111) plane, lattice constant, diameter and full width at half maximum (FWHM) for PtFeCu/C synthesized in varying pump flow rate.

| Samples       | $2\theta$ | $\theta$ | $d(111)/\text{\AA}$ | a      | D/nm   | FWHM  |
|---------------|-----------|----------|---------------------|--------|--------|-------|
| PtFeCu/C-1200 | 40.842    | 20.421   | 2.2076              | 3.8237 | 2.3559 | 0.621 |
| PtFeCu/C-600  | 40.757    | 20.3785  | 2.2120              | 3.8313 | 1.6397 | 0.892 |
| PtFeCu/C-300  | 40.757    | 20.3785  | 2.2121              | 3.8315 | 1.5985 | 0.915 |
| PtFeCu/C-60   | 40.838    | 20.419   | 2.2079              | 3.8242 | 1.4660 | 0.998 |
| Pt/C          | 39.76     | 19.88    | 2.265               | 3.9231 | 2.2685 | –     |
